# Supplementary material
Source: HighWire-hosted journal article supplement (http://thorax.bmjjournals.com/highwire/filestream/173947/field_highwire_adjunct_files/1/BTS_CAP_Children_online_Appendix_2.pdf)
Supplement: BTS_CAP_Children_online_Appendix_2.pdf [file BTS_CAP_Children_online_Appendix_2.pdf]

## **Appendix 2: Template data collection form for extracting study characteristics and study design items for risk of bias assessment**

*This form should be adapted for the collection of study characteristics in line with the methods outlined in the protocol of the review.*

### **Part 1: Administrative details**

*Extractor name:*

*Date:*

*Study ID:*

*Citation(s):*

**Part 2: Study methods, participants, interventions and outcomes** (intended to be entered in section 'Characteristics of included studies')

### **Methods**

STUDY DESIGN (parallel, crossover):

LOCATION, NUMBER OF CENTRES:

DURATION OF STUDY:

### **Participants**

N SCREENED:

N RANDOMISED:

N COMPLETED:

M=

F=

AGE:

BASELINE DETAILS:

INCLUSION CRITERIA:

EXCLUSION CRITERIA:

**Interventions**

INTERVENTION:

CONTROL:

RUN-IN PERIOD:

TREATMENT PERIOD:

FOLLOW-UP PERIOD:

CO-INTERVENTIONS:

**Outcomes:**

*Coding for subgroup analysis (e.g. adults/children; mild/moderate/severe etc):*

*Coding for sensitivity analysis (e.g. blinding; etc):*

**Part 3: Risk of bias items, notes for other extractors and correspondence**

Risk of bias assessment (amend as per stated risk of bias items in protocol):

| Item | Question | Judgement<br>(delete as appropriate) | Description (provide summary or paste from trial report/correspondence) |
|------|----------|--------------------------------------|-------------------------------------------------------------------------|
|------|----------|--------------------------------------|-------------------------------------------------------------------------|

|                                 |                                                                                                                                                          |                |  |
|---------------------------------|----------------------------------------------------------------------------------------------------------------------------------------------------------|----------------|--|
| Adequate allocation generation? | Was the allocation sequence adequately generated?                                                                                                        | Yes/No/Unclear |  |
| Allocation concealment?         | Was allocation adequately concealed?                                                                                                                     | Yes/No/Unclear |  |
| Blinding?                       | Was knowledge of the allocated interventions adequately prevented during the study? (the importance of this may depend on the outcome(s) being measured) | Yes/No/Unclear |  |
| Incomplete data addressed?      | Were incomplete data adequately addressed?                                                                                                               | Yes/No/Unclear |  |
| Free of selective reporting?    | Are reports of the study free of suggestion of selective reporting bias?                                                                                 | Yes/No/Unclear |  |
| Free of other bias?             | (Use additional rows if further risk of bias items are required)                                                                                         | Yes/No/Unclear |  |
| (Add items as appropriate)      |                                                                                                                                                          | Yes/No/Unclear |  |

**Notes:**

Requirement for further correspondence (see sheets with extracted data to see whether numerical outcome data are also required):

Yes/No

What information regarding the design of the study is needed from investigators/study sponsors?

What information regarding the results of the study is required from investigators/study sponsors
